# Supplementary material for: The Correlation between Cigarette Smoking and Rheumatoid Arthritis: An Eight-Year, Prospective, Clinical, Observational, Cohort Study
Source: Preprints.org preprint supplement (doi:10.20944/preprints202309.1478.v1), 2023-09-21
Supplement: Supplementary file 2 [file supplementary]

Archive with 13 entries (13 files):
- S14 DAS 28 CRP score form.pdf
- S1 CRF RA initial visit.doc
- S2 CRF OA initial visit.docx
- S3 CRF RA anual visit form.docx
- S4 CRF RA final visit.docx
- S5 RA final visit-unavailable.docx
- S6 CRF OA final visit.docx
- S7 CRF OA final visit - unavailable.docx
- S8 HAQ form.doc
- S9 LEQUESNE HIP OSTEOARTRITIS.docx
- S10 LEQUESNE KNEE OSTEOARTRITIS.docx
- S12 OSTEOARTHRITS FIST INDEX.docx
- Graphical absrtact - smoking.pdf
