# Supplementary material for: The Correlation between Cigarette Smoking and Rheumatoid Arthritis: An Eight-Year, Prospective, Clinical, Observational, Cohort Study
Source: Preprints.org preprint supplement (doi:10.20944/preprints202309.1478.v1), 2023-09-21
Supplement: Supplementary file 2 [file supplementary › S3 CRF RA anual visit form.docx]

OBRAZAC ZA GODIŠNJE VIZITE RA:

Šifra/broj ID:_____

VIZITA BROJ:

IME I PREZIME:

MBO:

DATUM:

SIMPTOMI I NALAZI:

DIJAGNOZE (sve):

KVB (priložit nalaze ako je dijagnosticirana):

KVB RIZIČNI FAKTORI (označi ako postoje):

- HIPERTENZIJA
- ŠEĆERNA BOLEST
- DISLIPIDEMIJA
- PUŠENJE CIGARETA (promjene statusa)

LIJEKOVI (promjene):

EGZACERBACIJA (FLARE) OD POSLJEDNJE VIZITE (ako je odgovor da priložiti nalaze):

DRUGE UPALNE BOLESTI (ako ih ima priložiti nalaze):

KIRUŠKI ZAHVATI RADI RA (ako ih ima priložiti nalaze):

AKTIVNOST BOLESTI (DAS 28 CRP SCORE):
