# Supplementary material for: The Correlation between Cigarette Smoking and Rheumatoid Arthritis: An Eight-Year, Prospective, Clinical, Observational, Cohort Study
Source: Preprints.org preprint supplement (doi:10.20944/preprints202309.1478.v1), 2023-09-21
Supplement: Supplementary file 2 [file supplementary › S5 RA final visit-unavailable.docx]

**Obrazac za bolesnike s RA**

**Šifra/broj ID:_____**

Ime i prezime

__________________

Adresa i mjesto stanovanja:

_______________________________

Datum rođenja: ______________________

JMBG _____________________

OIB ______________________

MBO(Matični broj osiguranika)__________________

**Zaokružiti razlog nedostupnosti ispitanika:**

1.nepotpuni kontakt podaci

2.ispitanik ne želi sudjelovati

3.smrtni ishod

4.drugo_______

Da li je od 1. pregleda nastupio smrtni ishod (zaokruži): da (_____g.) ne nepoznato

Ako je odgovor da, da li je uzrok smrti bio kardiovaskularni da ne

napišite uzrok smrti ukoliko je poznat: ____________

Poznati kardiovaskularni faktori rizika:
