# Supplementary material for: The Correlation between Cigarette Smoking and Rheumatoid Arthritis: An Eight-Year, Prospective, Clinical, Observational, Cohort Study
Source: Preprints.org preprint supplement (doi:10.20944/preprints202309.1478.v1), 2023-09-21
Supplement: Supplementary file 2 [file supplementary › S14 DAS 28 CRP score form.pdf]

# DAS28 - bodovi

Prezime: .....

Ime: .....

Datum rođenja: .....

Datum pregleda: .....

**ZGLOBOVI BOLNI NA DODIR**  
(br. zbd.):

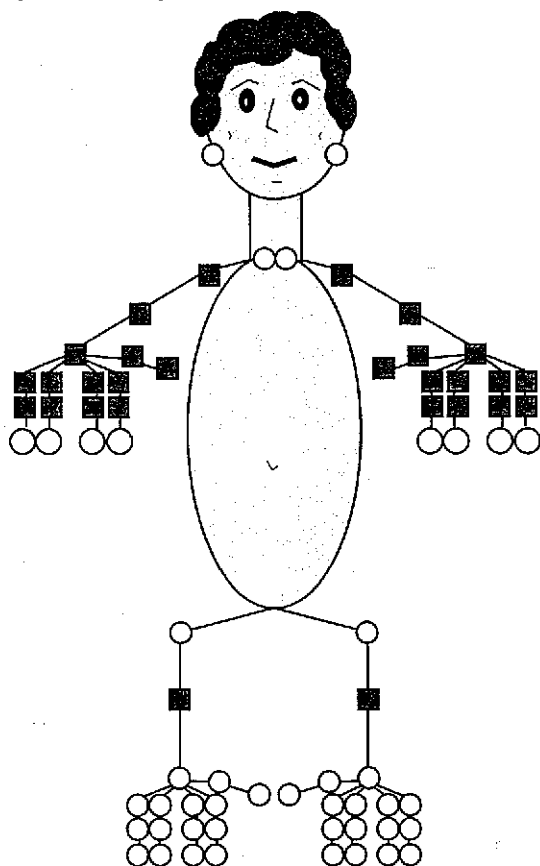

**OTEČENI ZGLOBOVI**  
(br. oz.):

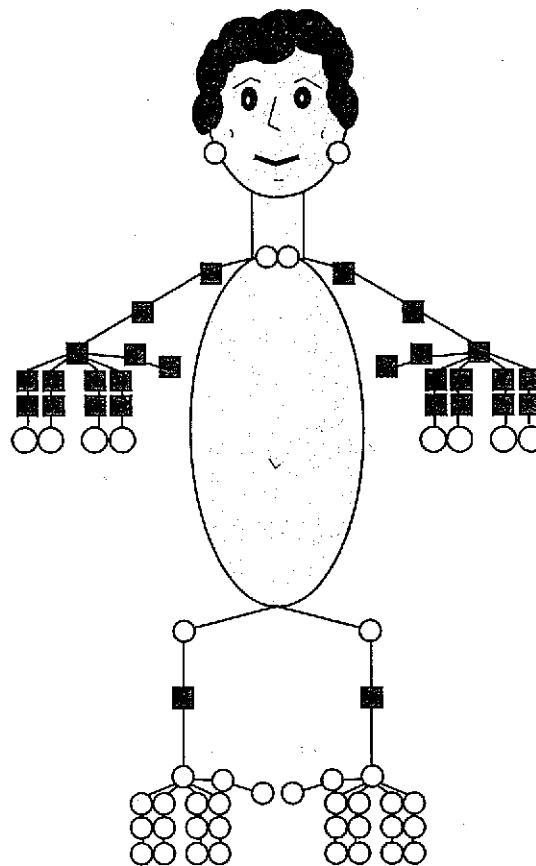

Sedimentacija eritrocita ~~CRP~~ nakon 1 h (mm):

Bolesnikova procjena aktivnosti bolesti (VAS; mm):

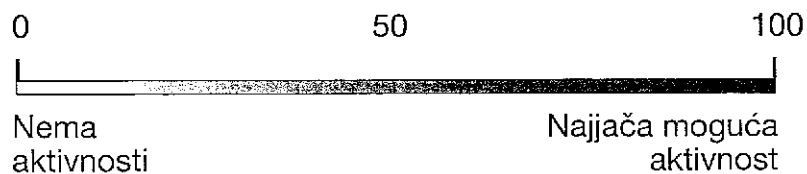

$$\text{DAS28} = 0,56 \times \sqrt{\text{br.zbd.}} + 0,28 \times \sqrt{\text{br.oz.}} + 0,7 \times \ln(\text{SE}) + 0,0142 \times \text{VAS}$$
