# Supplementary figures and images for: The Correlation between Cigarette Smoking and Rheumatoid Arthritis: An Eight-Year, Prospective, Clinical, Observational, Cohort Study
Source: Preprints.org preprint supplement (doi:10.20944/preprints202309.1478.v1), 2023-09-21

## Smoking and rheumatoid arthritis

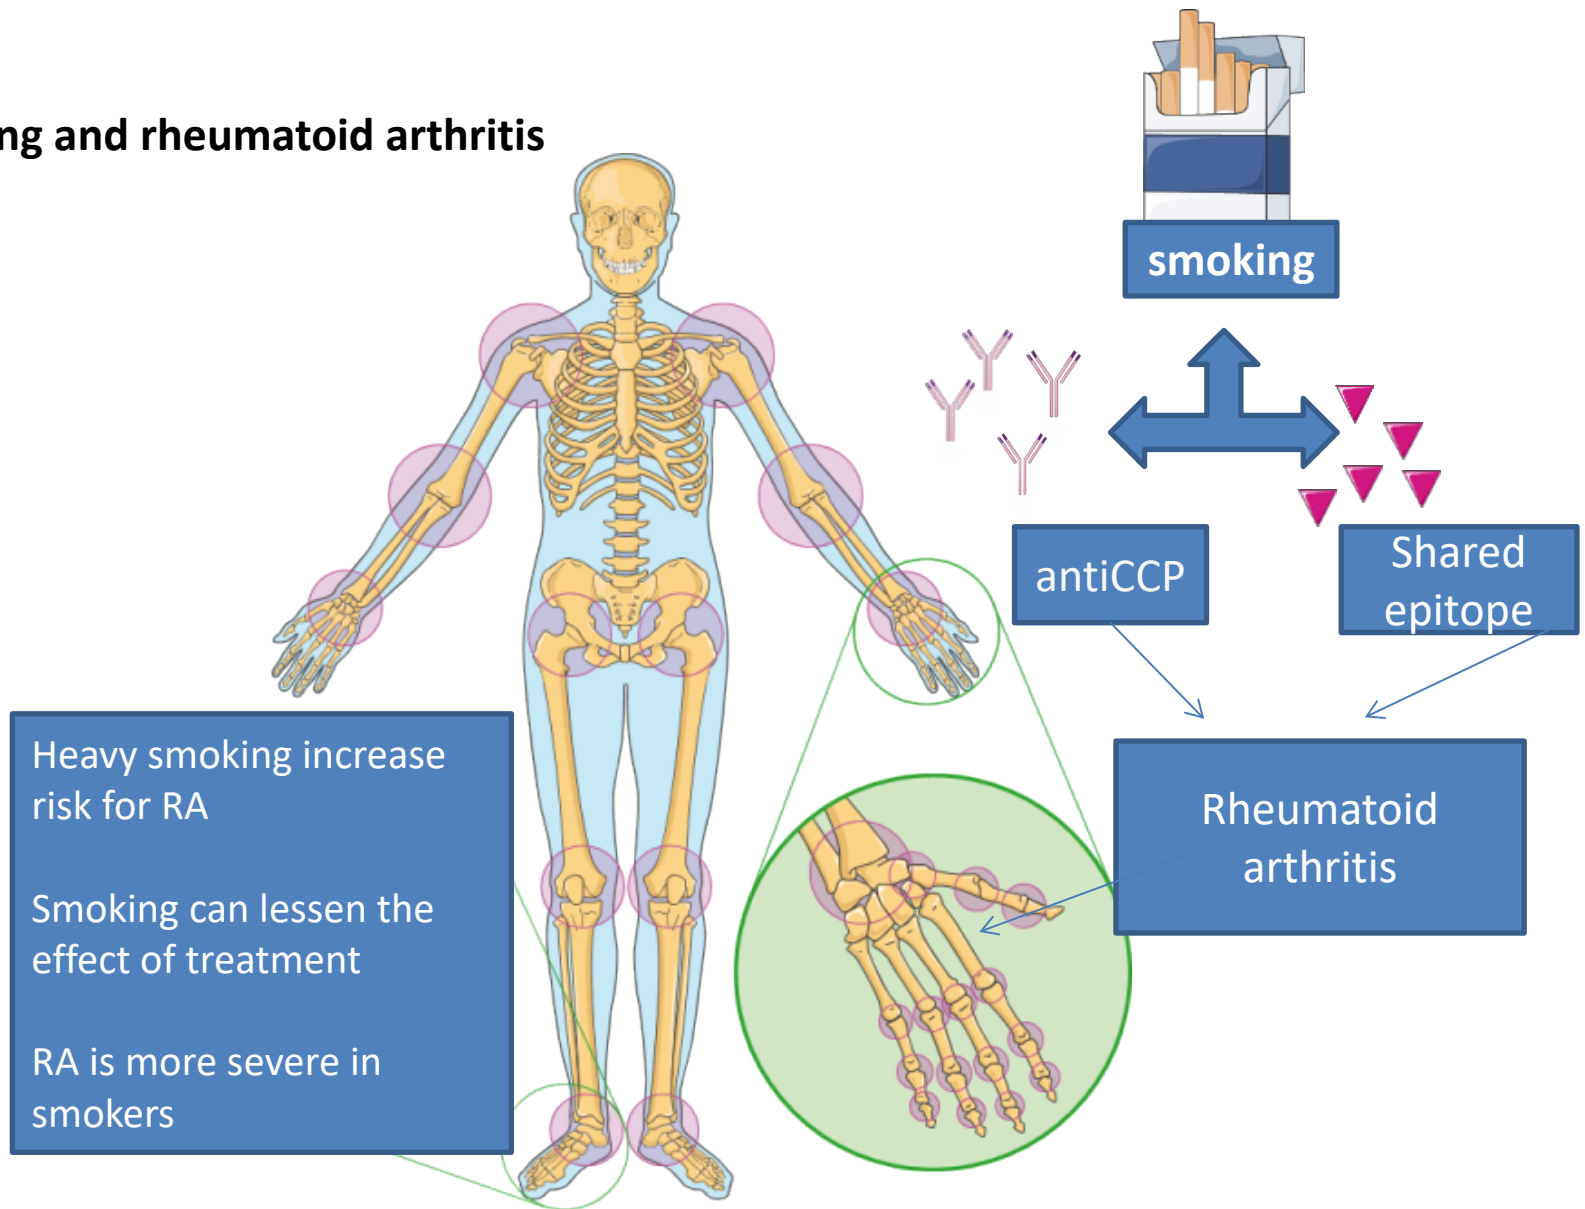

Supplement: Supplementary file 1 [file supplementary]
